# Supplementary material for: Facile surface functionalization of triboelectric layers via electrostatically self-assembled zwitterionic molecules for achieving efficient and stable antibacterial flexible triboelectric nanogenerators
Source: Royal Society of Chemistry journal article supplement (doi:10.1039/d3mh01529g), 2023-11-22
Supplement: d3mh01529g1.pdf [file d3mh01529g1.pdf]

## Electronic Supplementary Information

# Facile Surface Functionalization of Triboelectric Layers via Electrostatically Self-Assembled Zwitterionic Molecules for Achieving Efficient and Stable Antibacterial Flexible Triboelectric Nanogenerators

Chih-Yu Chang,\* Jia-Ruei Yang, Yi-Shan Liu, Abhisek Panda

Department of Materials Science and Engineering, National Taiwan University of Science and Technology, Taipei, 10607, Taiwan (R.O.C.) (E-mail: [cychang@gapps.ntust.edu.tw](mailto:cychang@gapps.ntust.edu.tw))

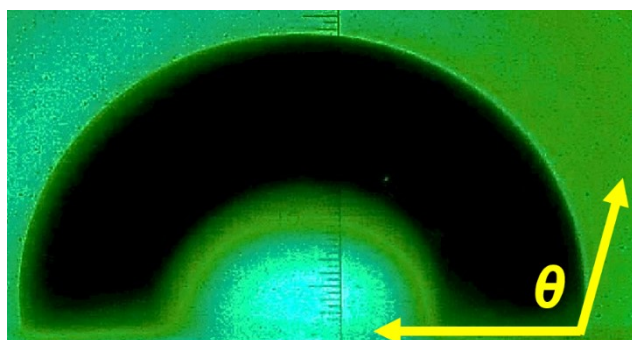

Fig. S1. Water contact angle analysis of PDMS layer.

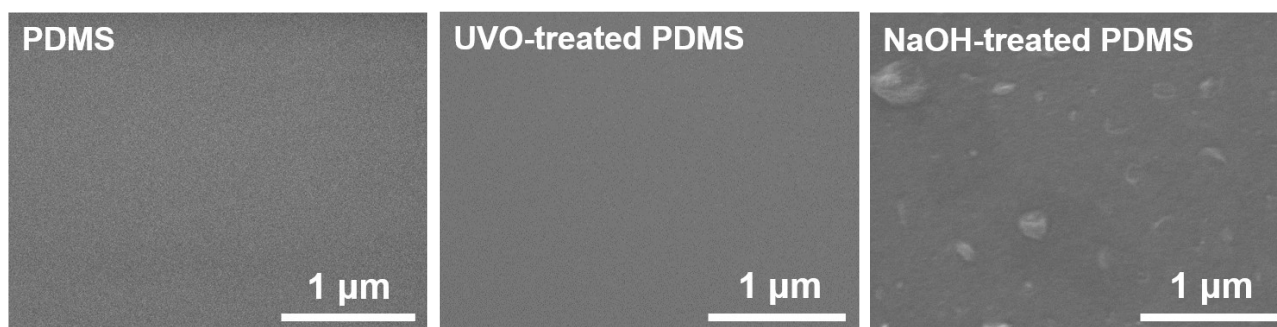

Fig. S2. Top-view SEM images of the samples.

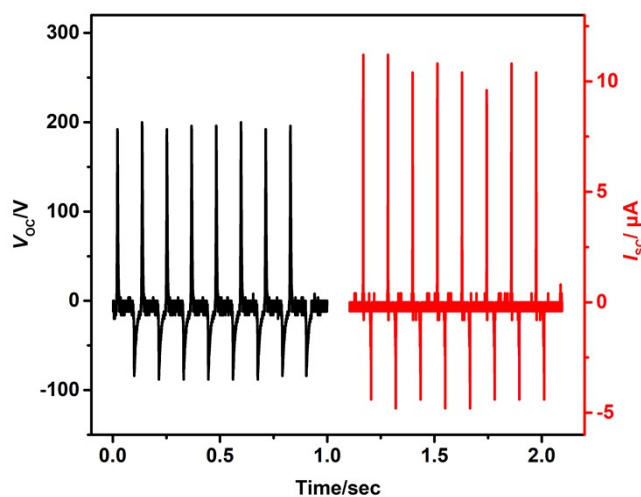

Fig. S3. Output characterization of TENG based on UVO-treated PDMS/NDSB.

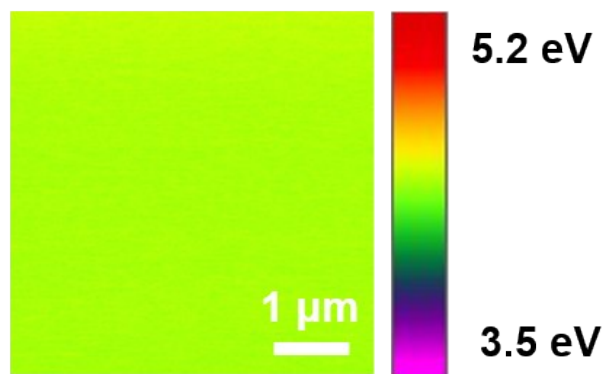

**Fig. S4.** KPFM image of UVO-treated PDMS/NDSB.

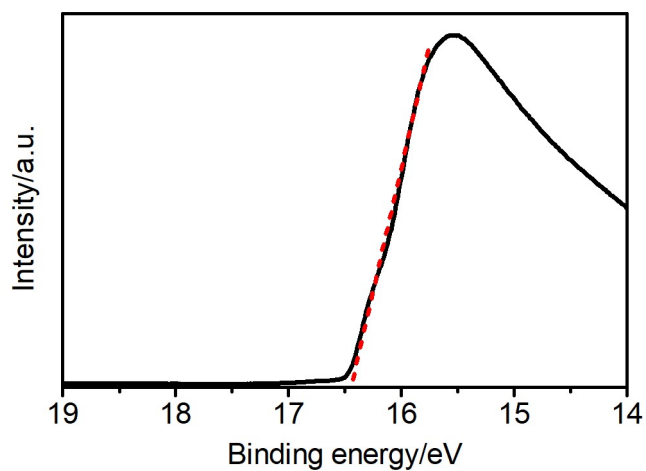

**Fig. S5.** UPS spectrum of NaOH-treated PDMS.

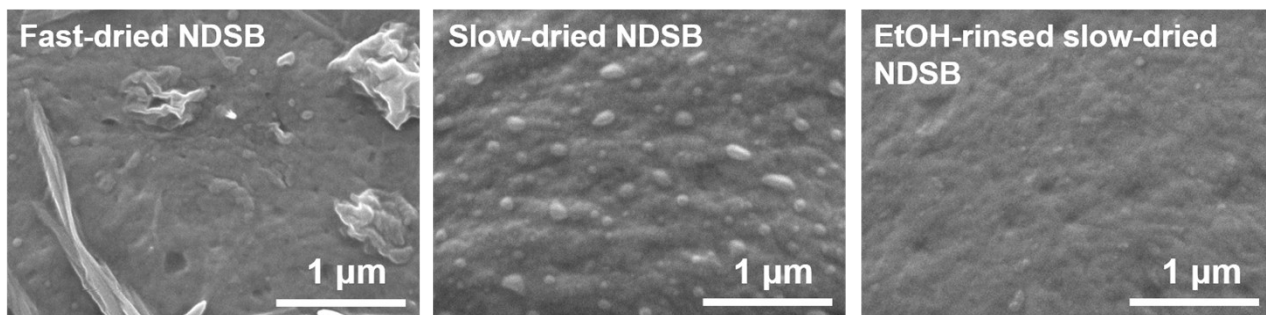

**Fig. S6.** Top-view SEM images of the samples.

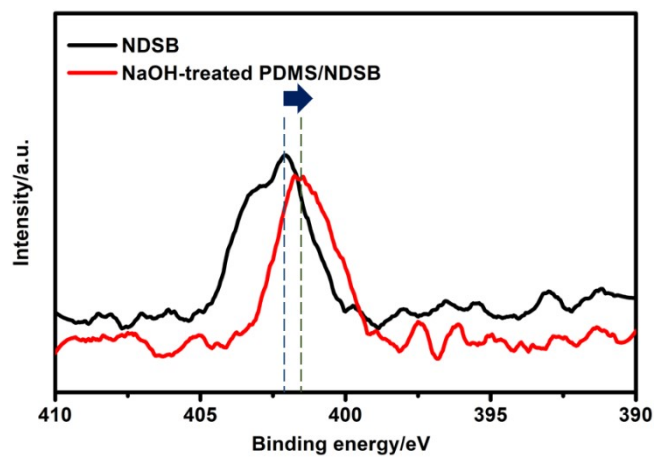

Fig. S7. High-resolution XPS of N 1s spectra of the samples.

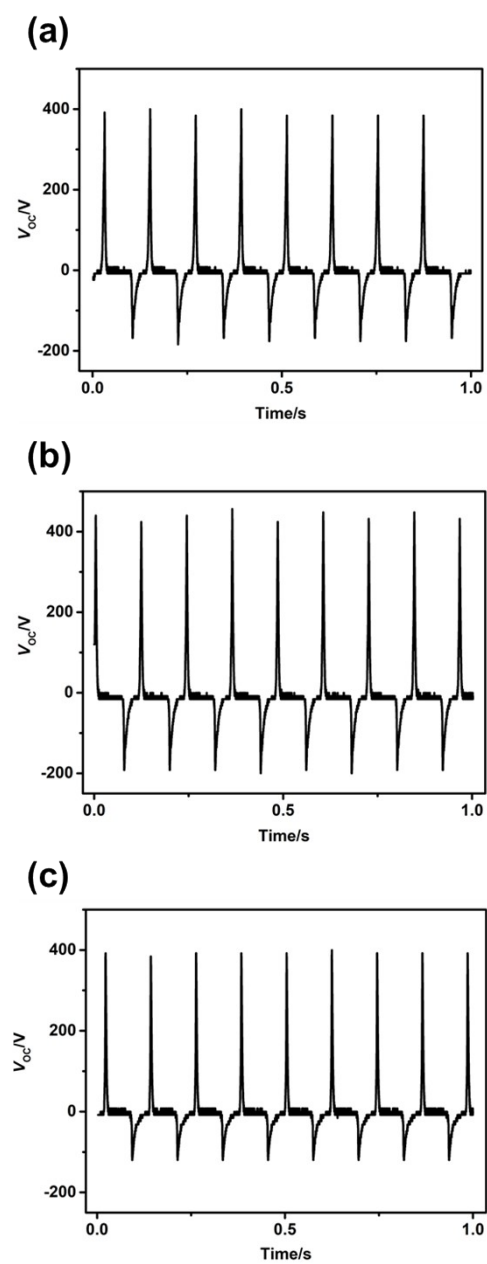

Fig. S8.  $V_{oc}$  output characteristics of TENG based on various concentration of NDSB: (a)  $5 \text{ mg mL}^{-1}$ , (b)  $10 \text{ mg mL}^{-1}$ , and (c)  $20 \text{ mg mL}^{-1}$ .

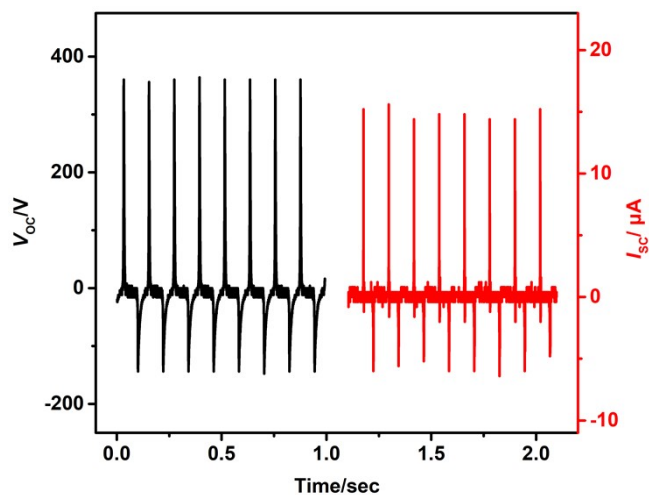

**Fig. S9.** Output characterization of TENG based on PDMS layer functionalized with fast-dried NDSB film after rinsing with EtOH.

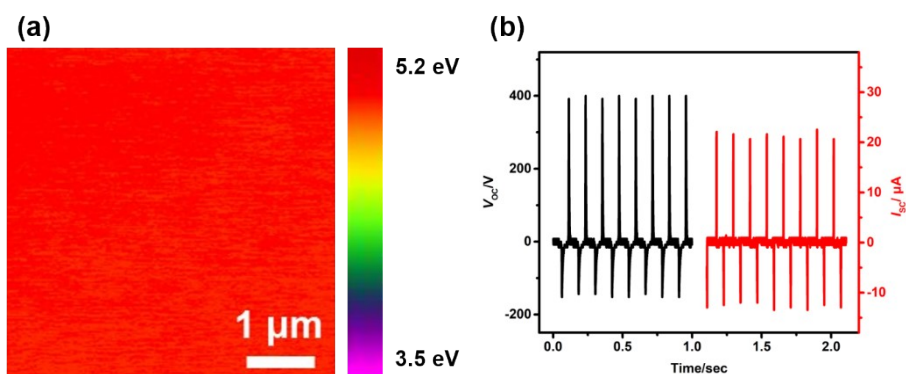

**Fig. S10.** (a) KPFM image of NDSB-functionalized PDMS layer after rinsing with EtOH. (b) Output characterization of TENG based on NDSB-functionalized PDMS layer after rinsing with EtOH.

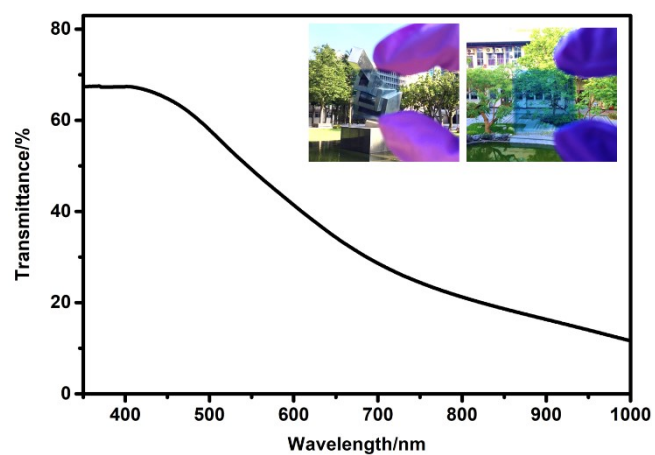

**Fig. S11.** Transmittance spectrum of DMSO-treated PEDOT:PSS layer (inset: photographs of DMSO-treated PEDOT:PSS layer).

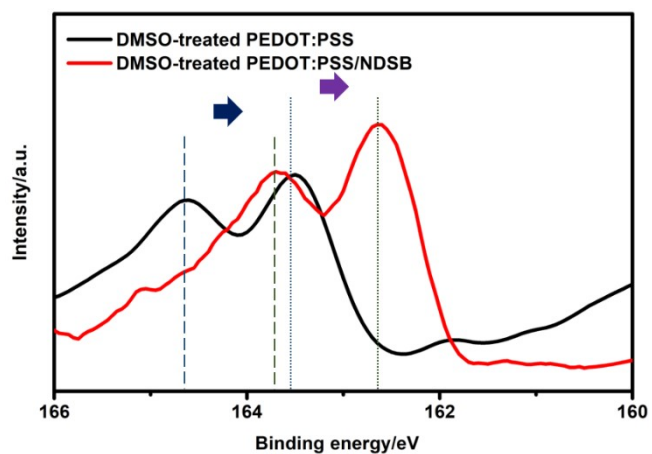

Fig. S12. High-resolution XPS of S 2p spectra of the samples.

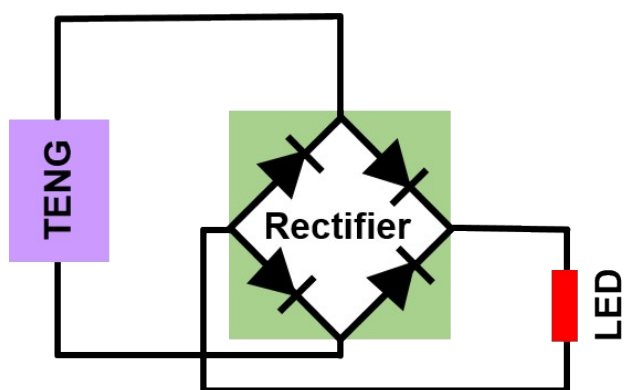

Fig. S13. Electrical circuit diagram for lighting up LEDs by TENG

## Biomedical Verification Laboratory Analysis/ Test Report

Date Received: 2023.07.26  
Assignment No: 112A011-D210443-FRE

Applicant: National Taiwan University of Science and  
Technology  
Address: Room E1-238, No. 43, Section 4, Keelung  
Road, Daan District, Taipei City 106335,  
Taiwan (R.O.C.)  
Articles: NDSB-modified PDMS

- Notice: 1. There are 4 pages in this report, including the cover page; The Test Report has to be presented, if necessary, as complete copy, not part of it.  
2. The contents of this report is for reference only, not for advertising, general public or any other commercial purposes.  
3. The article (s), name of the article (s) to be tested and Sampler (s) is supplied by the applicant ; PIDC is responsible for carrying out necessary analyzing procedures only.  
4. The Analysis/Test Report is invalid, if it is modified or duplicated without PIDC's permission. PIDC does not guarantee the reported values in the Report when test is done by using other test pieces. The Test Report may not be used as evidence in a court of law.  
5. “\*”Means the method has been certified by ISO/IEC 17025.

Authorized by Zhuang Jinyuan

Date: 2023.09.06

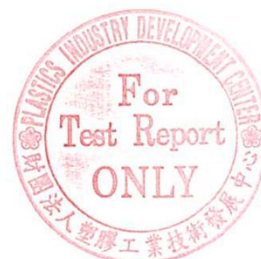

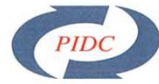

## Biomedical Verification Laboratory Analysis/ Test Report

Application No : 112A011-D210443-FRE

Date Tested : 2023.08.01

| Item(s)/ Method(s)                                     | Result(s)                                                                                              | Note                                               |
|--------------------------------------------------------|--------------------------------------------------------------------------------------------------------|----------------------------------------------------|
| 1. Antimicrobial Effectiveness Test<br>Ref. JIS Z2801- | Name of Test bacteria (Strain Number)                                                                  | <i>Escherichia coli</i> (ATCC 8739)                |
|                                                        | Concentration of inoculum                                                                              | $2.6 \times 10^5$ CFU/ml                           |
|                                                        | Average of the number of viable bacteria immediately after inoculation on the control sample ( $U_0$ ) | $6.5 \times 10^3$ CFU/cm <sup>2</sup> (Log : 3.81) |
|                                                        | Average of the number of viable bacteria on the control sample after 24 hours ( $U_t$ )                | $1.3 \times 10^6$ CFU/cm <sup>2</sup> (Log : 6.11) |
|                                                        | Average of the number of viable bacteria on the antimicrobial test piece after 24 hours ( $A_t$ )      | < 0.63 CFU/cm <sup>2</sup> (Log : < -0.2)          |
|                                                        | Value of antimicrobial activity (R)                                                                    | > 6.31                                             |

### REMARK:

1. Antimicrobial Effectiveness Test
  - 1.1 Reaction time: 24 hours
  - 1.2 CFU: Colony- forming unit.
  - 1.3 Culture conditions:  $35 \pm 1$  °C, 40~48 hours.
  - 1.4 Calculation :  $R = (U_t - U_0) - (A_t - U_0) = U_t - A_t$
  - 1.5 If the R value exceeds 2.0, it indicates that the test article demonstrates significant antimicrobial efficacy.
  - 1.6 The photo of sample: Attached photo 1.
  - 1.7 The photo of test results: Attached photo 2~3.  
<Blank Below>

**Fig. S14.** Antibacterial properties of NDSB-functionalized PDMS layer certified by a Taiwan-accredited testing center (Plastics Industry Development Center).

## Biomedical Verification Laboratory Analysis/ Test Report

Date Received: 2023.07.26  
Assignment No: 112A011-D210444-FRE

Applicant: National Taiwan University of Science and  
Technology  
Address: Room E1-238, No. 43, Section 4, Keelung  
Road, Daan District, Taipei City 106335,  
Taiwan (R.O.C.)  
Articles: NDSB-modified PEDOT:PSS

- Notice: 1. There are 4 pages in this report, including the cover page; The Test Report has to be presented, if necessary, as complete copy, not part of it.  
2. The contents of this report is for reference only, not for advertising, general public or any other commercial purposes.  
3. The article (s), name of the article (s) to be tested and Sampler (s) is supplied by the applicant ; PIDC is responsible for carrying out necessary analyzing procedures only.  
4. The Analysis/Test Report is invalid, if it is modified or duplicated without PIDC's permission. PIDC does not guarantee the reported values in the Report when test is done by using other test pieces. The Test Report may not be used as evidence in a court of law.  
5. “\*”Means the method has been certified by ISO/IEC 17025.

Authorized by 

Date: 2023.09.06

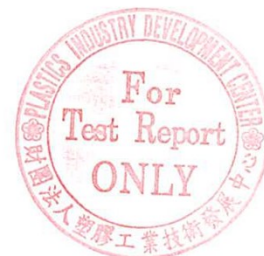



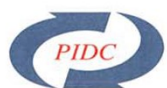

## Biomedical Verification Laboratory Analysis/ Test Report

Application No : 112A011-D210444-FRE

Date Tested : 2023.08.01

| Item(s)/ Method(s)                                     | Result(s)                                                                                                      | Note                                                   |
|--------------------------------------------------------|----------------------------------------------------------------------------------------------------------------|--------------------------------------------------------|
| 1. Antimicrobial Effectiveness Test<br>Ref. JIS Z2801- | Name of Test bacteria (Strain Number)                                                                          | <i>Escherichia coli</i> (ATCC 8739)                    |
|                                                        | Concentration of inoculum                                                                                      | 2.6 x 10 <sup>5</sup> CFU/ml                           |
|                                                        | Average of the number of viable bacteria immediately after inoculation on the control sample (U <sub>0</sub> ) | 6.5 x 10 <sup>3</sup> CFU/cm <sup>2</sup> (Log : 3.81) |
|                                                        | Average of the number of viable bacteria on the control sample after 24 hours (U <sub>t</sub> )                | 1.3 x 10 <sup>6</sup> CFU/cm <sup>2</sup> (Log : 6.11) |
|                                                        | Average of the number of viable bacteria on the antimicrobial test piece after 24 hours (A <sub>t</sub> )      | < 0.63 CFU/cm <sup>2</sup> (Log : < -0.2)              |
|                                                        | Value of antimicrobial activity (R)                                                                            | > 6.31                                                 |

### REMARK:

#### 1. Antimicrobial Effectiveness Test

1.1 Reaction time: 24 hours

1.2 CFU: Colony- forming unit.

1.3 Culture conditions: 35 ± 1 °C, 40~48 hours.

1.4 Calculation:  $R = (U_t - U_0) - (A_t - U_0) = U_t - A_t$

1.5 If the R value exceeds 2.0, it indicates that the test article demonstrates significant antimicrobial efficacy.

1.6 The photo of sample: Attached photo 1.

1.7 The photo of test results: Attached photo 2~3.

<Blank Below>
